# Supplementary material
Source: MDPI journal article supplement (https://www.mdpi.com/2073-4344/13/3/465)
Supplement: s1 [file s1]

# *SUPPLEMENTARY MATERIALS*

## **Electrocatalytic Oxidation of Nitrophenols via Ag Nanoparticles Supported on Citric-Acid-Modified Polyaniline**

**Milad Khani <sup>1</sup>, Ramaswami Sammynaiken <sup>2,\*</sup> and Lee D. Wilson <sup>1,\*</sup>**

<sup>1</sup> Department of Chemistry, University of Saskatchewan, 110 Science Place, Saskatoon, SK S7N 5C9, Canada

<sup>2</sup> Saskatchewan Structural Sciences Centre, 110 Science Place, Saskatoon, SK S7N 5C9, Canada

\* Correspondence: r.sammynaiken@usask.ca (R.S.); lee.wilson@usask.ca (L.D.W.);  
Tel.: +1-306-966-4733 (R.S.); +1-306-966-2961 (L.D.W.)

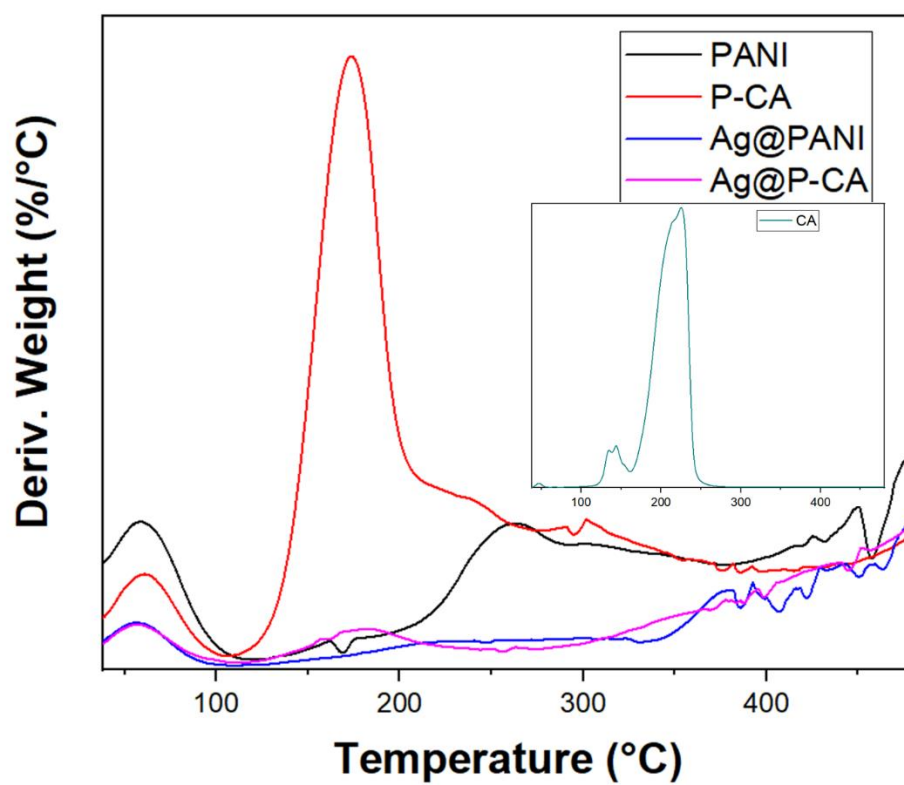

**Figure S1.** First derivative TGA of modified PANI-based composites and their precursors. The TGA profile is shown as an inset.

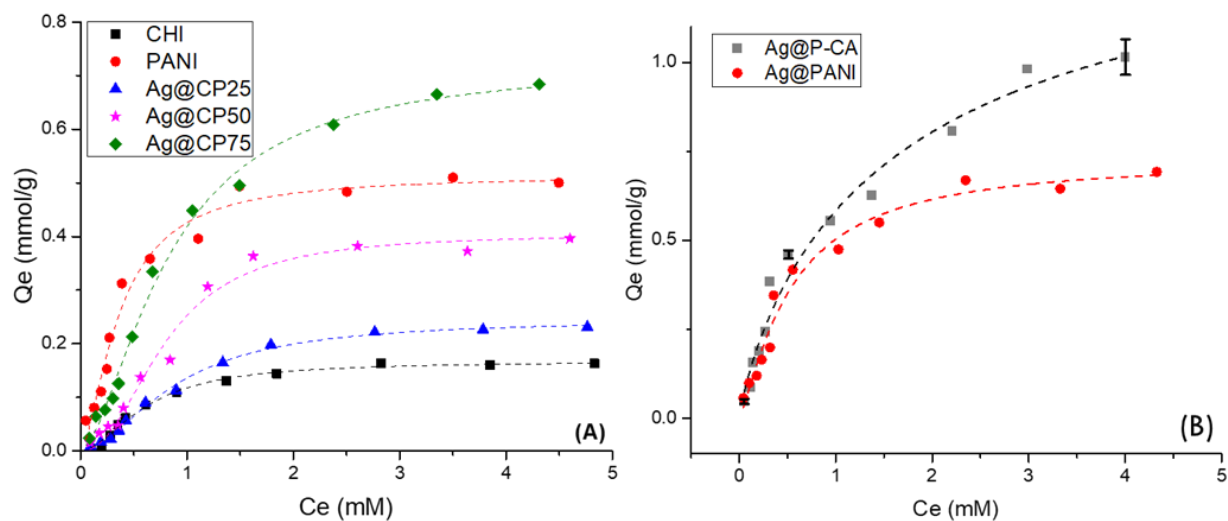

**Figure S2.** 2-NP adsorption study of modified PANI-based composites and their precursors and fitted isotherms at 295 K and pH = 7 (PBS-7 buffer solution). Dashed lines represent fitted Sips models for each isotherm at 295 K. The plots are based on the amount of dye adsorbed for a given weight of adsorbent ( $Q_e$ ) vs the dye residual equilibrium concentration ( $C_e$ ). Panel (A) refers to CHI-based composites and panel (B) refers to non-CHI-based composites. In panel (B), error bars are shown for Ag@P-CA to illustrate typical error estimated at low, medium, and higher dye concentration.

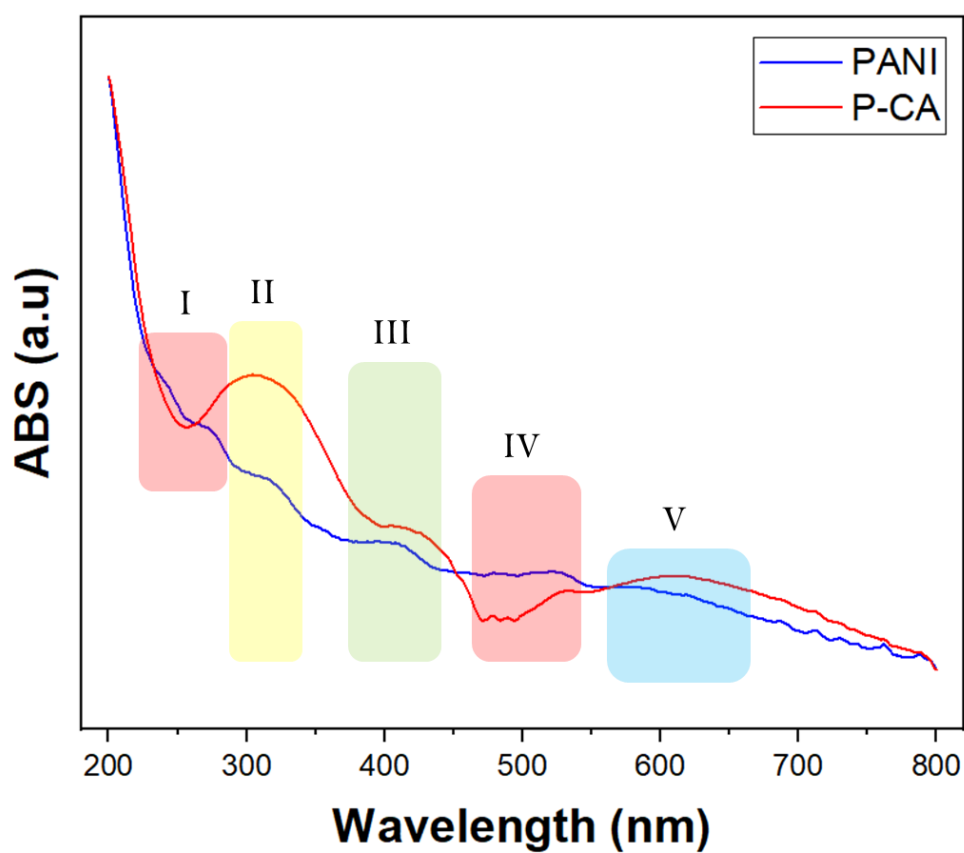

**Figure S3.** Solid-state UV-Vis spectra of modified PANI-based composites and the precursors (chitosan, PANI). The highlighted areas illustrate characteristic bands (I, II, III, IV, and V) of the samples. The spectra are not normalized, but scaled from 0 to 1 for qualitative comparison of the respective spectra.

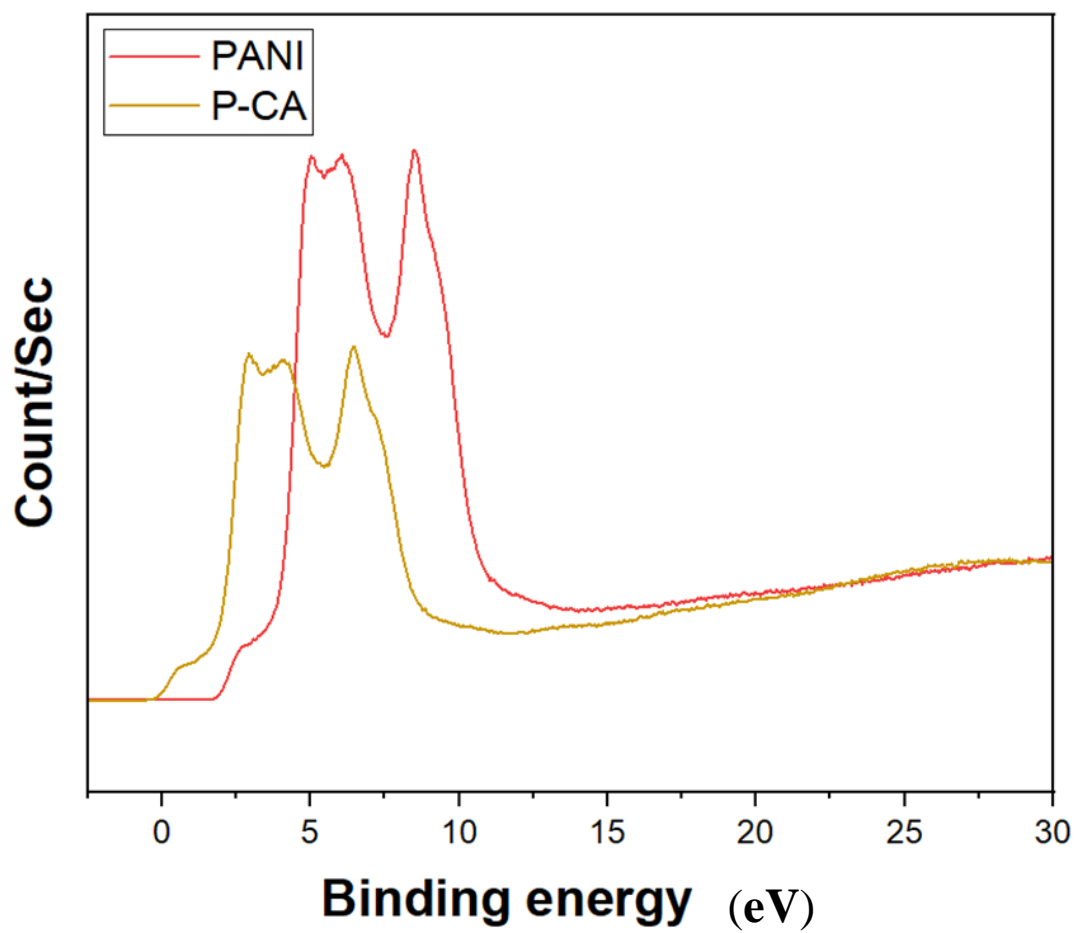

**Figure S4.** Valence band XPS of modified PANI-based composites. The XPS was calibrated to the C 1s spectrum at 284.8 eV, where the X-axis represents the binding energy (eV).

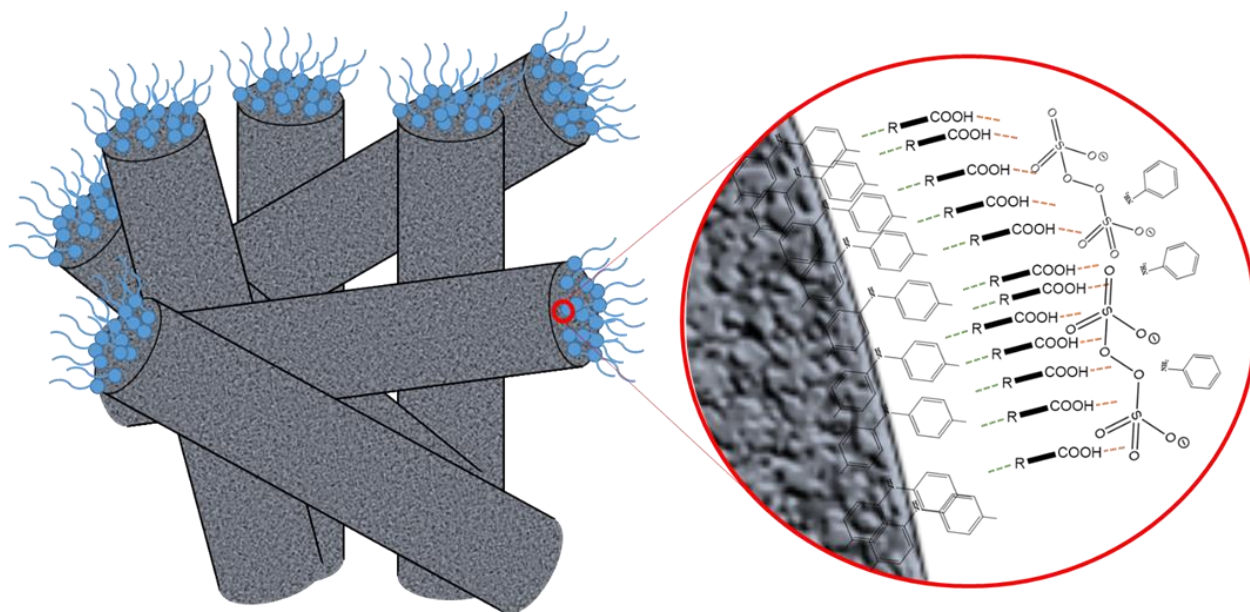

**Figure S5.** The micellar role of organic acids (denoted in blue) in the polymerization of aniline (located at the grey interface region). R represents the hydrocarbon that may possess variable functionality.

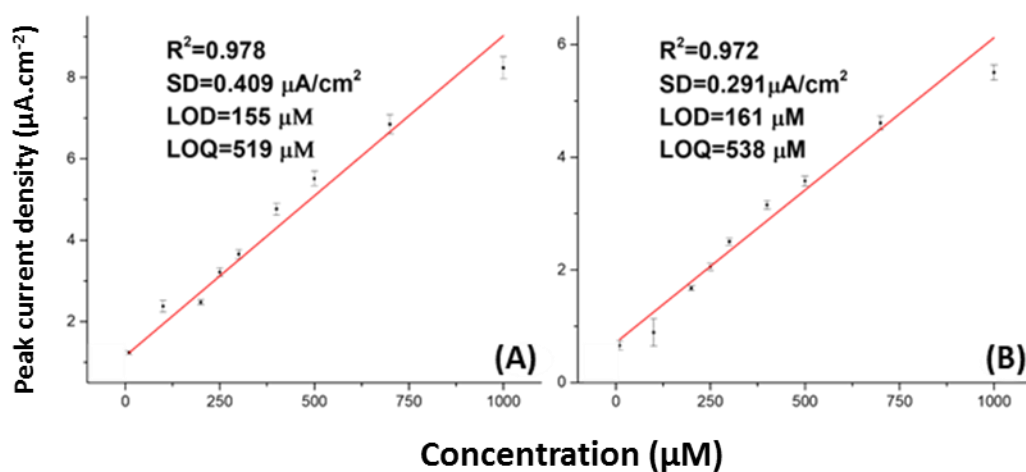

**Figure S6.** Calibration curves for the detection of 2-NP (A) and 4-NP (B) with Ag@P-CA modified electrode material and their electrochemical characteristic parameters (SD: standard deviation, LOD: limit of detection, LOQ: limit of quantification). The Y-axis represents current density ( $\mu\text{A}\cdot\text{cm}^{-2}$ ), and X-axis represents concentration ( $\mu\text{M}$ ). The CV analysis of the composites was carried out at a scan rate of  $50 \text{ mV}\cdot\text{s}^{-1}$  and a potential range from  $-600$  to  $1200 \text{ mV}$  using the three-electrode system in PBS-7 buffer solution ( $\text{pH} = 7$ ) at  $298 \text{ K}$ .

**Table S1.** Recent examples of literature studies for the detection of nitrophenols.

| Analyte        | Detection method                 |
|----------------|----------------------------------|
| 4-NP [25]      | fluorescent sensor               |
| 4-NP [26]      | fluorescent sensor               |
| 4-NP [36]      | fluorescent sensor               |
| 4-NP [37]      | electrochemical sensor           |
| 4-NP [38]      | fluorescent sensor               |
| 4-NP [39]      | fluorescent sensor               |
| 4-NP [40]      | electrochemical sensor           |
| 4-NP [41]      | electrochemical sensor           |
| 4-NP [42]      | electrochemical sensor           |
| 4-NP [43]      | fluorescent sensor               |
| 2-NP [27]      | electrochemical sensor           |
| 4-NP [28]      | electrochemical sensor           |
| 4-NP [29]      | electrochemical sensor           |
| 4-NP [30]      | electrochemical sensor           |
| 4-NP [31]      | fluorescent sensor               |
| 2-NP/4-NP [32] | electrochemical sensor           |
| 4-NP [33]      | surface plasmon resonance sensor |
| 4-NP [34]      | fluorescent sensor               |
| 4-NP [35]      | luminescent sensor               |



**Table S2.** Examples of recent studies on the electrochemical detection of nitrophenols.

| Analyte        | Detection method | Approach           | Linear range ( $\mu\text{M}$ ) | Detection limit (nM)  |
|----------------|------------------|--------------------|--------------------------------|-----------------------|
| 4-NP [37]      | DPV              | Reduction reaction | 2.0–9.0 and 9.0–210.0          | 700                   |
| 4-NP [40]      | DPV              | Reduction reaction | 0.1–4.0 and 5–150              | 65                    |
| 4-NP [41]      | SWV              | Reduction reaction | 3–50                           | 23                    |
| 4-NP [42]      | SWV              | Reduction reaction | 3–50                           | 10                    |
| 2-NP [27]      | LSV              | Reduction reaction | 0.5–100                        | 160                   |
| 4-NP [28]      | DPV              | Reduction reaction | 0.05–200                       | 60                    |
| 4-NP [29]      | DPV              | Reduction reaction | 0.5–250                        | 100                   |
| 4-NP [30]      | SWV              | Reduction reaction | 3–50                           | 110                   |
| 2-NP/4-NP [32] | DPV              | Reduction reaction | 100–370                        | 300 (4-NP)/360 (2-NP) |
| 4-NP [74]      | DPV              | Reduction reaction | 2–1117                         | 39                    |

## S1. TGA Results

Non-PANI content in Ag@PANI composites is assumed to be a mixture of PANI oligomers and the acid dopant. Since aniline as a limiting reagent was converted to PANI and its oligomers; therefore, there is a linear relationship between the content (%) of PANI and its oligomers.

In the following equations, P = PANI, O = PANI oligomers, and A = Acid dopant.

$$Non - PANI = A + O$$

$$P = 100 - O$$

## S2. XRD Results

The crystalline size of Ag NPs deposited onto composites was calculated based on Debye–Scherrer equation (Equation S1).

$$D = \frac{K\lambda}{\beta \cos(\theta)} \quad (S1)$$

Where D indicates the crystalline size of Ag NPs, K is a constant equal to 0.90,  $\lambda$  is the wavelength of the incident X-ray,  $\beta$  is the FWHM of the related diffraction, and  $\theta$  is the Bragg angle. The instrumental broadening effect was calculated based on Equation S2 and subtracted from  $\beta_{\text{measured}}$  based on Equation S3.

$$\beta_{\text{instrumental}} = 0.00558 \tan^2(\theta) - 0.00901 \tan(\theta) + 0.01039 \quad (S2)$$

$$\beta_1 = \sqrt{\beta_{\text{measured}}^2 - \beta_{\text{instrumental}}^2} \quad (S3)$$

The microstrain effect was calculated based on Equation S4 and subtracted from  $\beta_1$  based on Equation S5.

$$\varepsilon = \frac{\beta_{\text{measured}}}{4 \tan(\theta)} \quad (S4)$$

$$\beta = \beta_1 - \varepsilon \quad (S5)$$

### S3. Dye Adsorption Results

A dye adsorption isotherm is a plot of the amount of dye adsorbed for a given weight of adsorbent ( $Q_e$ ) vs the dye residual equilibrium concentration ( $C_e$ ). Equation S6 gives the value of  $Q_e$ , where  $C_0$  is the initial dye concentration,  $V$  is the volume of solution, and  $m$  is the sorbent weight.

$$Q_e = \frac{C_0 - C_e}{m} \times V \quad (S6)$$

$C_0$  is measured based on the linear calibration curve obtained from the Beer-Lambert law. (Equation S7) where  $A$  is the optical absorbance (unitless),  $\epsilon$  is molar absorptivity ( $\text{mM}^{-1}.\text{cm}^{-1}$ ),  $b$  is the length of the cuvette (cm), and  $c$  is the concentration of the sample ( $\text{mol.L}^{-1}$ ).

$$A = \epsilon bc \quad (S7)$$

The Langmuir (Equation S8), Freundlich (Equation S9), and Sips (Equation S10) isotherm models have been used to estimate adsorption isotherms.

$$Q_e = \frac{K_L Q_m C_e}{1 + K_L C_e} \quad (S8)$$

$$Q_e = K_F C_e^{1/n_f} \quad (S9)$$

$$Q_e = \frac{Q_m (K_S C_e)^{n_s}}{1 + (K_S C_e)^{n_s}} \quad (S10)$$
